# Supplementary material
Source: PubMed Central journal article supplement (PMC419582)

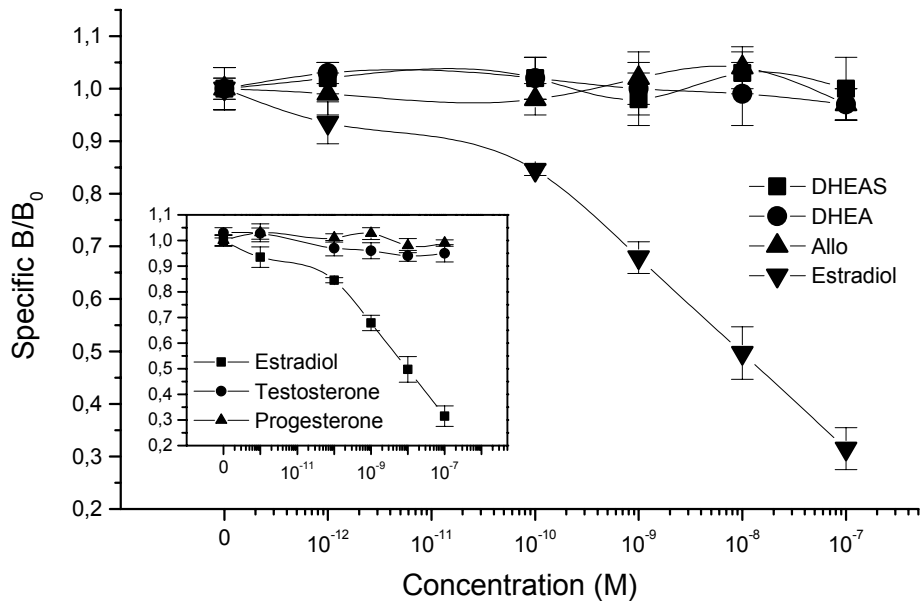

Supplement: pnas_101_21_8209__1.pdf [file pnas_101_21_8209__1.pdf]
